# Supplementary material
Source: PubMed Central journal article supplement (PMC7483627)
Supplement: NIHMS1606245-supplement-1.pdf [file NIHMS1606245-supplement-1.pdf]

## **Supplemental Methods and Results**

**eTable 1.** SNP identifier, chromosome, effect allele, reference allele, and position (based on version 37) and beta (model weight) for the 54 SNPs used in the polygenic hazard score (PHS) calculation\*.

| SNP ID          | PHS beta | Chromosome | Position  | Effect | Reference |
|-----------------|----------|------------|-----------|--------|-----------|
| rs6545977       | -0.066   | 2          | 63301164  | C      | G         |
| rs1010          | 0.05     | 2          | 85808982  | G      | A         |
| rs16860513      | 0.198    | 2          | 173342367 | A      | G         |
| c3_pos87230612  | -0.115   | 3          | 87147922  | T      | A         |
| rs6788616       | -0.04    | 3          | 87205079  | A      | G         |
| rs4857841       | 0.029    | 3          | 128046643 | T      | A         |
| c3_pos171557211 | 0.073    | 3          | 170074517 | C      | G         |
| rs6853490       | -0.054   | 4          | 95544718  | G      | A         |
| rs2136486       | 0.024    | 4          | 95571976  | G      | A         |
| rs7679673 §     | -0.066   | 4          | 106061534 | A      | G         |
| rs7725218       | -0.07    | 5          | 1282414   | T      | A         |
| rs2736108       | 0.05     | 5          | 1297488   | A      | G         |
| rs10866528      | -0.045   | 5          | 1891821   | A      | T         |
| rs10051795      | -1.501   | 5          | 100648792 | C      | A         |
| rs17596465      | 0.114    | 6          | 93471818  | G      | A         |
| rs3910736       | -0.068   | 6          | 153412476 | G      | A         |
| rs651164        | -0.05    | 6          | 160581374 | A      | G         |
| rs7769879       | 0.054    | 6          | 160865645 | G      | A         |
| rs6965016       | -0.052   | 7          | 97807882  | G      | A         |
| rs13265330      | -0.06    | 8          | 23525543  | A      | C         |
| rs9297746       | 0.055    | 8          | 127909361 | A      | G         |
| rs28556804      | 0.077    | 8          | 128014315 | G      | A         |
| c8_pos128146328 | 0.174    | 8          | 128077146 | A      | G         |
| rs7841060       | -0.082   | 8          | 128096477 | C      | A         |
| rs13252265      | -0.055   | 8          | 128203859 | A      | C         |
| c8_pos128389706 | 0.066    | 8          | 128320524 | C      | G         |
| rs6983267 §     | -0.095   | 8          | 128413305 | A      | G         |
| rs9297759       | 0.073    | 8          | 128519171 | A      | G         |
| rs12549761      | 0.054    | 8          | 128540776 | A      | G         |
| c10_pos8072007  | -1.53    | 10         | 8032001   | A      | G         |
| rs10993994 §    | 0.1      | 10         | 51549496  | A      | T         |
| c11_pos2181240  | 0.068    | 11         | 2224664   | G      | C         |
| rs12275055      | -0.076   | 11         | 68981359  | C      | A         |
| rs7929962       | 0.048    | 11         | 68985583  | G      | A         |

|                 |        |    |           |   |   |
|-----------------|--------|----|-----------|---|---|
| rs11568818 §    | 0.041  | 11 | 102401661 | A | G |
| rs10875943 §    | -0.041 | 12 | 49676010  | T | A |
| rs4919763       | -0.05  | 12 | 53279623  | A | C |
| rs3861106       | -0.914 | 13 | 63485756  | A | G |
| rs4643253       | 0.052  | 14 | 69106108  | G | C |
| rs684232 §      | -0.039 | 17 | 618965    | C | G |
| rs718961        | -0.075 | 17 | 36077099  | C | G |
| rs11651052      | -0.093 | 17 | 36102381  | A | G |
| c17_pos44175675 | 0.142  | 17 | 46820676  | G | C |
| rs9889335       | 0.077  | 17 | 69115146  | G | A |
| rs11672691 §    | -0.059 | 19 | 41985587  | A | G |
| rs17632542      | 0.14   | 19 | 51361757  | G | A |
| rs4809311       | 0.049  | 20 | 62233764  | A | G |
| c22_pos41831564 | 0.084  | 22 | 43501620  | A | G |
| rs747745        | 0.044  | 22 | 43503547  | A | G |
| rs4907775       | 0.131  | 23 | 51263200  | G | A |
| rs5945631       | -0.192 | 23 | 51268884  | A | G |
| rs7888856       | 0.049  | 23 | 66751555  | G | A |
| rs11795627      | -0.042 | 23 | 69957441  | A | G |
| rs232964        | 1.031  | 23 | 76136958  | A | G |

\* Comparing the 54 SNPs included in PHS and the 147 SNPs identified in a recent meta-analysis of men with European ancestry<sup>1</sup>, there were 7 PHS SNPs that were exact matches (§) with one of the 147 meta-analysis SNPs.

**eFigure 1.** Incidence of prostate cancer, stratified by clinically significant and clinically insignificant, as derived from application of polygenic hazard score (PHS) hazard ratios and population data from the United Kingdom. The overall population incidence is taken as the median risk (50<sup>th</sup> percentile); this accounts for age-specific proportions of prostate cancer that were clinically significant in the CAP trial<sup>2</sup>. Hazard ratios were calculated within ProtecT data for various levels of genetic risk ranges (0-2, 2-10, 10-30, 30-70, 70-90, 90-98, and 98-100) to correspond to percentiles of interest (1, 5, 20, 50, 80, 95, and 99, respectively), and used to adjust the median incidence curve. Blue lines represent genetic risk lower than the median while red lines represent genetic risk higher than the median. Solid lines represent clinically significant prostate cancer, while dashed lines represent clinically insignificant cases. The sum of clinically significant and clinically insignificant incidence would estimate the incidence of any prostate cancer.

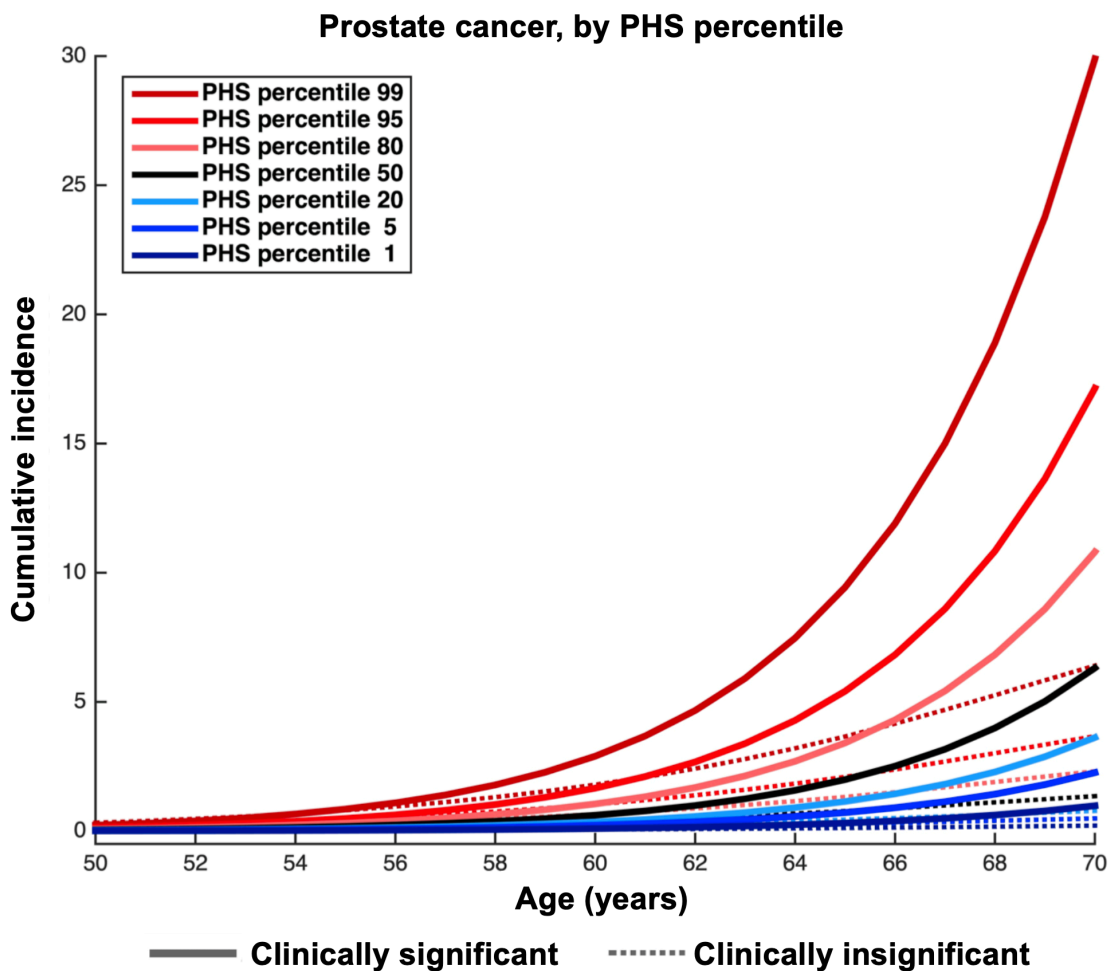

**eFigure 2.** Incidence of more aggressive prostate cancer, as derived from application of polygenic hazard score (PHS) hazard ratios and population data from the United Kingdom. The stricter definition for more aggressive disease corresponds to clinical high risk or above by NCCN guidelines—i.e., any of: clinical stage T3-T4, PSA>20, Gleason score  $\geq 8$ , or nodal/distant metastases<sup>3</sup>. The overall population incidence is taken as the median risk (50<sup>th</sup> percentile); this accounts for age-specific proportions of more aggressive prostate cancer reported in the CAP trial<sup>2</sup>. Hazard ratios were calculated within ProtecT data for various levels of genetic risk ranges (0-2, 2-10, 10-30, 30-70, 70-90, 90-98, and 98-100) to correspond to percentiles of interest (1, 5, 20, 50, 80, 95, and 99, respectively), and used to adjust the median incidence curve. Blue lines represent genetic risk lower than the median while red lines represent genetic risk higher than the median.

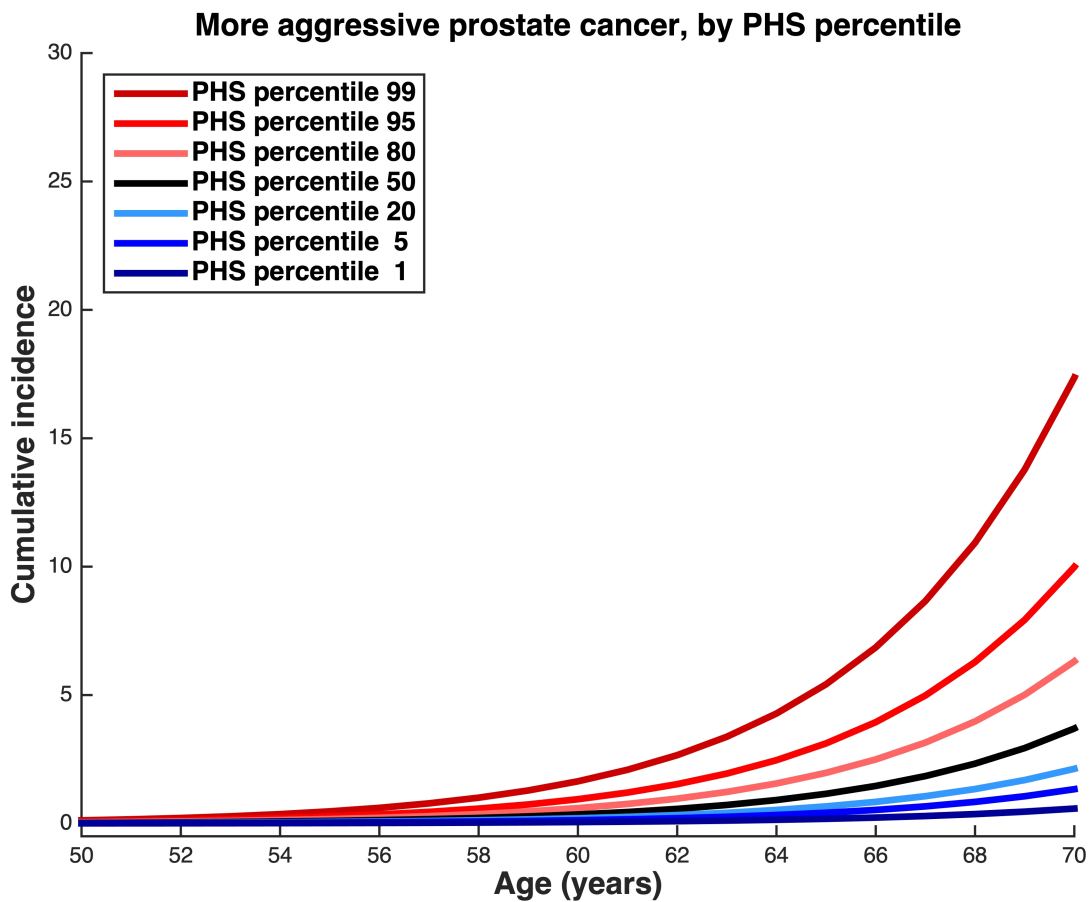

## References from Supplemental Material

1. Schumacher FR, Al Olama AA, Berndt SI, et al. Association analyses of more than 140,000 men identify 63 new prostate cancer susceptibility loci. *Nat Genet.* 2018;50(7):928-936. doi:10.1038/s41588-018-0142-8
2. Martin RM, Donovan JL, Turner EL, et al. Effect of a low-intensity PSA-based screening intervention on prostate cancer mortality: The CAP randomized clinical trial. *JAMA - J Am Med Assoc.* 2018;319(9):883-895. doi:10.1001/jama.2018.0154
3. NCCN Clinical Practice Guidelines in Oncology. Prostate Cancer. Version 1.2019.
